# Supplementary material
Source: ML conference proceedings conference paper supplement (https://openreview.net/forum?id=n1q-iz83S5)
Supplement: supplementary_material [file attachment]

https://anonymous.4open.science/r/focus-reproducibility-1612/README.md
